# Supplementary material for: Functional analysis of Hsh155/SF3b1 interactions with the U2 snRNA/branch site duplex
Source: PubMed Central journal article supplement — RNA. 2018 Aug;24(8):1028–40. doi: 10.1261/rna.065664.118 (PMC6049509; doi:10.1261/rna.065664.118), 2018-08
Supplement: supp_065664.118_Supplemental_Table_S1_.pdf [file supp_065664.118_Supplemental_Table_S1_.pdf]

**Supplemental Table S1.** Plasmids used in this study.

| <b>#</b>              | <b>Plasmid Name</b>                  | <b>Plasmid Description</b>                                                                                                         |
|-----------------------|--------------------------------------|------------------------------------------------------------------------------------------------------------------------------------|
| pAAH0403 <sup>1</sup> | pRS414-Hsh155 <sup>WT</sup>          | Plasmid used to generate Hsh155 <sup>WT</sup> strain. Hsh155 coding region +/- 250bp was cloned into pRS414 using SacI/XhoI sites. |
| pAAH0854              | Hsh155 T178A                         | Used to generate a strain with mutated Hsh155. Made by site-directed mutagenesis of pAAH0403                                       |
| pAAH0855              | Hsh155 R181A                         | Used to generate a strain with mutated Hsh155. Made by site-directed mutagenesis of pAAH0403                                       |
| pAAH0856              | Hsh155 R182A                         | Used to generate a strain with mutated Hsh155. Made by site-directed mutagenesis of pAAH0403                                       |
| pAAH0857              | Hsh155 R186A                         | Used to generate a strain with mutated Hsh155. Made by site-directed mutagenesis of pAAH0403                                       |
| pAAH0858              | Hsh155 T178A R181A R182A R186A (N4A) | Used to generate a strain with mutated Hsh155. Made by site-directed mutagenesis of pAAH0403                                       |
| pAAH0860              | Hsh155 K227A                         | Used to generate a strain with mutated Hsh155. Made by site-directed mutagenesis of pAAH0403                                       |
| pAAH0862              | Hsh155 Q773A                         | Used to generate a strain with mutated Hsh155. Made by site-directed mutagenesis of pAAH0403                                       |
| pAAH0863              | Hsh155 R775A                         | Used to generate a strain with mutated Hsh155. Made by site-directed mutagenesis of pAAH0403                                       |
| pAAH0864              | Hsh155 Q776A                         | Used to generate a strain with mutated Hsh155. Made by site-directed mutagenesis of pAAH0403                                       |
| pAAH0865              | Hsh155 R778A                         | Used to generate a strain with mutated Hsh155. Made by site-directed mutagenesis of pAAH0403                                       |
| pAAH0866              | Hsh155 Q773A R775A R776A Q778A (C4A) | Used to generate a strain with mutated Hsh155. Made by site-directed mutagenesis of pAAH0403                                       |
| pAAH0818              | Hsh155 K740A                         | Used to generate a strain with mutated Hsh155. Made by site-directed mutagenesis of pAAH0403                                       |
| pAAH0819              | Hsh155 R744A                         | Used to generate a strain with mutated Hsh155. Made by site-directed mutagenesis of pAAH0403                                       |
| pAAH0820              | Hsh155 N747A                         | Used to generate a strain with mutated Hsh155. Made by site-directed mutagenesis of pAAH0403                                       |
| pAAH0821              | Hsh155 V783A                         | Used to generate a strain with mutated Hsh155. Made by site-directed mutagenesis of pAAH0403                                       |
| pAAH0822              | Hsh155 K818A                         | Used to generate a strain with mutated Hsh155. Made by site-directed mutagenesis of pAAH0403                                       |
| pAAH0823              | Hsh155 Y826A                         | Used to generate a strain with mutated Hsh155. Made by site-directed mutagenesis of pAAH0403                                       |
| pAAH0875              | Hsh155 K740R                         | Used to generate a strain with mutated Hsh155. Made by site-directed mutagenesis of pAAH0403                                       |
| pAAH0876              | Hsh155 N747D                         | Used to generate a strain with mutated Hsh155. Made by site-directed mutagenesis of pAAH0403                                       |
| pAAH0878              | Hsh155 V783L                         | Used to generate a strain with mutated Hsh155. Made by site-directed mutagenesis of pAAH0403                                       |
| pAAH0879              | Hsh155 K818R                         | Used to generate a strain with mutated Hsh155. Made by site-directed mutagenesis of pAAH0403                                       |
| pAAH0933              | Hsh155 64-972                        | Used to generate a strain with truncated Hsh155 (aa 64-972). Made by site-directed mutagenesis of pAAH0403                         |
| pAAH0934              | Hsh155 96-972                        | Used to generate a strain with truncated Hsh155 (aa 95-972). Made by site-directed mutagenesis of pAAH0403                         |
| pAAH0958              | Hsh155 103-972                       | Used to generate a strain with truncated Hsh155 (aa 103-972). Made by site-directed mutagenesis of pAAH0403                        |

|          |                        |                                                                                                             |
|----------|------------------------|-------------------------------------------------------------------------------------------------------------|
| pAAH0935 | Hsh155 157-972         | Used to generate a strain with truncated Hsh155 (aa 157-972). Made by site-directed mutagenesis of pAAH0403 |
| pAAH0959 | Hsh155 197-972         | Used to generate a strain with truncated Hsh155 (aa 197-972). Made by site-directed mutagenesis of pAAH0403 |
| pAAH0936 | Hsh155 237-972         | Used to generate a strain with truncated Hsh155 (aa 237-972). Made by site-directed mutagenesis of pAAH0403 |
| pAAH0960 | Hsh155 275-972         | Used to generate a strain with truncated Hsh155 (aa 275-972). Made by site-directed mutagenesis of pAAH0403 |
| pAAH0961 | Hsh155 310-972         | Used to generate a strain with truncated Hsh155 (aa 310-972). Made by site-directed mutagenesis of pAAH0403 |
| pAAH0962 | Hsh155 351-972         | Used to generate a strain with truncated Hsh155 (aa 351-972). Made by site-directed mutagenesis of pAAH0403 |
| pAAH0963 | Hsh155 472-972         | Used to generate a strain with truncated Hsh155 (aa 472-972). Made by site-directed mutagenesis of pAAH0403 |
| pAAH0964 | Hsh155 1-966           | Used to generate a strain with truncated Hsh155 (aa 1-966). Made by site-directed mutagenesis of pAAH0403   |
| pAAH0965 | Hsh155 1-961           | Used to generate a strain with truncated Hsh155 (aa 1-961). Made by site-directed mutagenesis of pAAH0403   |
| pAAH0966 | Hsh155 1-956           | Used to generate a strain with truncated Hsh155 (aa 1-956). Made by site-directed mutagenesis of pAAH0403   |
| pAAH0967 | Hsh155 1-951           | Used to generate a strain with truncated Hsh155 (aa 1-951). Made by site-directed mutagenesis of pAAH0403   |
| pAAH0937 | Hsh155 1-945           | Used to generate a strain with truncated Hsh155 (aa 1-945). Made by site-directed mutagenesis of pAAH0403   |
| pAAH0938 | Hsh155 1-910           | Used to generate a strain with truncated Hsh155 (aa 1-910). Made by site-directed mutagenesis of pAAH0403   |
| pAAH0869 | Hsh155 3xFLAG          | Same as pAAH0403 but with 3xFLAG at C-terminus                                                              |
| pAAH0945 | Hsh155 Hs 1-5 3xFLAG   | Human HEATs 1-5 have been inserted into pAAH0869.                                                           |
| pAAH0944 | Hsh155 Hs 1-12 3xFLAG  | Human HEATs 1-12 have been inserted into pAAH0869.                                                          |
| pAAH0946 | Hsh155 Hs 1-16 3xFLAG  | Human HEATs 1-16 have been inserted into pAAH0869.                                                          |
| pAAH0940 | Hsh155 Hs 5-12 3xFLAG  | Human HEATs 5-12 have been inserted into pAAH0869.                                                          |
| pAAH0943 | Hsh155 Hs 5-16 3xFLAG  | Human HEATs 5-16 have been inserted into pAAH0869.                                                          |
| pAAH0939 | Hsh155 Hs 5-20 3xFLAG  | Human HEATs 5-20 have been inserted into pAAH0869.                                                          |
| pAAH0941 | Hsh155 Hs 12-20 3xFLAG | Human HEATs 12-20 have been inserted into pAAH0869.                                                         |
| -        | pACT1CUP1 WT           | WT reporter used for ACT1-CUP1 assays. Gift of D. Brow <sup>2</sup>                                         |
| -        | pACT1CUP1 U254G        | BS U254G reporter used for ACT1-CUP1 assays. Gift of C. Query                                               |
| -        | pACT1CUP1 A255G        | BS A255G reporter used for ACT1-CUP1 assays. Gift of C. Query                                               |
| -        | pACT1CUP1 C256A        | BS C256A reporter used for ACT1-CUP1 assays. Gift of C. Query                                               |
| -        | pACT1CUP1 U257A        | BS U257A reporter used for ACT1-CUP1 assays. Gift of C. Query                                               |
| -        | pACT1CUP1 U257C        | BS U257C reporter used for ACT1-CUP1 assays. Gift of C. Query                                               |
| -        | pACT1CUP1 U257G        | BS U257G reporter used for ACT1-CUP1 assays. Gift of C. Query                                               |
| -        | pACT1CUP1 A258C        | BS A258C reporter used for ACT1-CUP1 assays. Gift of C. Query                                               |
| -        | pACT1CUP1 A258G        | BS A258G reporter used for ACT1-CUP1 assays. Gift of C. Query                                               |
| -        | pACT1CUP1 A258U        | BS A258U reporter used for ACT1-CUP1 assays. Gift of C. Query                                               |

|          |                        |                                                                                                              |
|----------|------------------------|--------------------------------------------------------------------------------------------------------------|
| -        | pACT1CUP1 BS C (A259C) | BS A259C reporter used for ACT1-CUP1 assays.<br>Gift of C. Query                                             |
| -        | pACT1CUP1 BS G (A259G) | BS A259C reporter used for ACT1-CUP1 assays.<br>Gift of C. Query                                             |
| -        | pACT1CUP1 C260G        | BS C260G reporter used for ACT1-CUP1 assays.<br>Gift of C. Query                                             |
| pAAH1047 | Hsh155 N4A 3xFLAG      | Derived from pAAH0869. Contains T178A, R181A, R182A, R186A. Used for western blotting to confirm expression. |
| pAAH1048 | Hsh155 R775A 3xFLAG    | Derived from pAAH0869. Contains R775A. Used for WB to confirm mutant expression.                             |
| pAAH1049 | Hsh155 R778A 3xFLAG    | Derived from pAAH0869. Contains R778A. Used for WB to confirm mutant expression.                             |
| pAAH1050 | Hsh155 K818A 3xFLAG    | Derived from pAAH0869. Contains K818A. Used for WB to confirm mutant expression.                             |

<sup>1</sup>Originally described in Carrocci et al. 2017.

<sup>2</sup>Originally described in Lesser and Guthrie 1993.
