# Supplementary material for: Functional analysis of Hsh155/SF3b1 interactions with the U2 snRNA/branch site duplex
Source: PubMed Central journal article supplement — RNA. 2018 Aug;24(8):1028–40. doi: 10.1261/rna.065664.118 (PMC6049509; doi:10.1261/rna.065664.118), 2018-08
Supplement: supp_065664.118_Supplemental_Table_S2.pdf [file supp_065664.118_Supplemental_Table_S2.pdf]

**Supplemental Table S2. Yeast strains used in this study.**

| <b>Name</b>           | <b>Genotype</b>                                                                                              | <b>Description</b>                                                                                                                                                                                                                                                                                 |
|-----------------------|--------------------------------------------------------------------------------------------------------------|----------------------------------------------------------------------------------------------------------------------------------------------------------------------------------------------------------------------------------------------------------------------------------------------------|
| 46α <sup>1</sup>      | <i>MAT a cup1Δ ura3 his3 trp1 lys2 ade2 leu2</i>                                                             | Used to generate Hsh155 shuffle strain (kind gift of Dave Brow).                                                                                                                                                                                                                                   |
| yAAH0465 <sup>2</sup> | <i>MAT a cup1Δ ura3 his3 trp1 lys2 ade2 leu2 hsh155::kanMX pRS416-HSH155</i>                                 | Derived from 46α. Copper sensitive strain used to generate Hsh155 mutant strains for <i>ACT1-CUP1</i> by plasmid shuffle. Hsh155 was deleted using a KanMX cassette.                                                                                                                               |
| yAAH1568 <sup>2</sup> | <i>MAT a prc1 prb1 pep4 leu2 trp1 ura3 PRP5V5 hsh155::kanMX pRS416-HSH155<sup>wt</sup></i>                   | Derived from ySSC026 (kind gift of Soo-Chen Cheng). Protease deficient strain with Prp5 V5-tagged at the C-terminus. The genomic copy of Hsh155 was deleted using a KanMX cassette and Hsh155 is expressed from pRS416. This strain was used to generate Hsh155 mutant strains by plasmid shuffle. |
| yAAH0648 <sup>2</sup> | <i>MAT a cup1Δ ura3 his3 trp1 lys2 ade2 leu2 hsh155::kanMX pRS414-HSH155<sup>WT</sup></i>                    | Copper sensitive strain expressing Hsh155 <sup>WT</sup> . Used for <i>ACT1-CUP1</i> assays after transformation with reporter plasmids.                                                                                                                                                            |
| yTJC0472              | <i>MAT a cup1Δ ura3 his3 trp1 lys2 ade2 leu2 hsh155::kanMX pRS414-HSH155<sup>N4A</sup></i>                   | Copper sensitive strain expressing Hsh155 T178A R181A R182A R186A. Transformed with <i>ACT1-CUP1</i> reporters.                                                                                                                                                                                    |
| yTJC0298              | <i>MAT a cup1Δ ura3 his3 trp1 lys2 ade2 leu2 hsh155::kanMX pRS414-HSH155<sup>K740A</sup></i>                 | Copper sensitive strain expressing Hsh155 K740A. Transformed with <i>ACT1-CUP1</i> reporters.                                                                                                                                                                                                      |
| yTJC0300              | <i>MAT a cup1Δ ura3 his3 trp1 lys2 ade2 leu2 hsh155::kanMX pRS414-HSH155<sup>N747A</sup></i>                 | Copper sensitive strain expressing Hsh155 N747A. Transformed with <i>ACT1-CUP1</i> reporters.                                                                                                                                                                                                      |
| yTJC0301              | <i>MAT a cup1Δ ura3 his3 trp1 lys2 ade2 leu2 hsh155::kanMX pRS414-HSH155<sup>V783A</sup></i>                 | Copper sensitive strain expressing Hsh155 V783A. Transformed with <i>ACT1-CUP1</i> reporters.                                                                                                                                                                                                      |
| yTJC0483              | <i>MAT a cup1Δ ura3 his3 trp1 lys2 ade2 leu2 hsh155::kanMX pRS414-HSH155<sup>K740R</sup></i>                 | Copper sensitive strain expressing Hsh155 K740R. Transformed with <i>ACT1-CUP1</i> reporters.                                                                                                                                                                                                      |
| yTJC0485              | <i>MAT a cup1Δ ura3 his3 trp1 lys2 ade2 leu2 hsh155::kanMX pRS414-HSH155<sup>N747Q</sup></i>                 | Copper sensitive strain expressing Hsh155 N747Q. Transformed with <i>ACT1-CUP1</i> reporters.                                                                                                                                                                                                      |
| yTJC0486              | <i>MAT a cup1Δ ura3 his3 trp1 lys2 ade2 leu2 hsh155::kanMX pRS414-HSH155<sup>V783L</sup></i>                 | Copper sensitive strain expressing Hsh155 V783L. Transformed with <i>ACT1-CUP1</i> reporters.                                                                                                                                                                                                      |
| yTJC0487              | <i>MAT a cup1Δ ura3 his3 trp1 lys2 ade2 leu2 hsh155::kanMX pRS414-HSH155<sup>K818R</sup></i>                 | Copper sensitive strain expressing Hsh155 K818R. Transformed with <i>ACT1-CUP1</i> reporters.                                                                                                                                                                                                      |
| yTJC0842              | <i>MAT a cup1Δ ura3 his3 trp1 lys2 ade2 leu2 hsh155::kanMX pRS414-HSH155<sup>WT,3xFLAG</sup></i>             | Copper sensitive strain expressing Hsh155 WT with C-terminal 3xFLAG tag. Transformed with <i>ACT1-CUP1</i> reporters.                                                                                                                                                                              |
| yTJC0843              | <i>MAT a cup1Δ ura3 his3 trp1 lys2 ade2 leu2 hsh155::kanMX pRS414-HSH155<sup>Hs1-12,3xFLAG</sup></i>         | Copper sensitive strain expressing Hsh155 Hs 1-12 with C-terminal 3xFLAG tag. Transformed with <i>ACT1-CUP1</i> reporters.                                                                                                                                                                         |
| yTJC0844              | <i>MAT a cup1Δ ura3 his3 trp1 lys2 ade2 leu2 hsh155::kanMX pRS414-HSH155<sup>Hs1-12 K666E,3xFLAG</sup></i>   | Copper sensitive strain expressing Hsh155 Hs 1-12 K700E with C-terminal 3xFLAG tag. Transformed with <i>ACT1-CUP1</i> reporters.                                                                                                                                                                   |
| yTJC0845              | <i>MAT a cup1Δ ura3 his3 trp1 lys2 ade2 leu2 hsh155::kanMX pRS414-HSH155<sup>Hs1-12 K700E,3xFLAG</sup></i>   | Copper sensitive strain expressing Hsh155 Hs 1-12 K700E with C-terminal 3xFLAG tag. Transformed with <i>ACT1-CUP1</i> reporters.                                                                                                                                                                   |
| yTJC0864              | <i>MAT a cup1Δ ura3 his3 trp1 lys2 ade2 leu2 hsh155::kanMX pRS414-HSH155<sup>Hs5-16,3xFLAG</sup></i>         | Copper sensitive strain expressing Hsh155 Hs 5-16 with C-terminal 3xFLAG tag. Transformed with <i>ACT1-CUP1</i> reporters.                                                                                                                                                                         |
| yTJC0865              | <i>MAT a cup1Δ ura3 his3 trp1 lys2 ade2 leu2 hsh155::kanMX pRS414-HSH155<sup>Hs5-16 R1074H,3xFLAG</sup></i>  | Copper sensitive strain expressing Hsh155 Hs 5-16 R1074H with C-terminal 3xFLAG tag. Transformed with <i>ACT1-CUP1</i> reporters.                                                                                                                                                                  |
| yTJC0866              | <i>MAT a prc1 prb1 pep4 leu2 trp1 ura3 PRP5V5 hsh155::kanMX pRS414-HSH155<sup>wt,3xFLAG</sup></i>            | Derived from yAAH1568. Used to generate <i>in vitro</i> splicing extracts containing Hsh155 WT with 3 copies of the FLAG tag.                                                                                                                                                                      |
| yTJC0867              | <i>MAT a prc1 prb1 pep4 leu2 trp1 ura3 PRP5V5 hsh155::kanMX pRS414-HSH155<sup>Hs1-12,3xFLAG</sup></i>        | Derived from yAAH1568. Used to generate <i>in vitro</i> splicing extracts containing Hsh155 Hs 1-12 with 3 copies of the FLAG tag.                                                                                                                                                                 |
| yTJC0868              | <i>MAT a prc1 prb1 pep4 leu2 trp1 ura3 PRP5V5 hsh155::kanMX pRS414-HSH155<sup>Hs5-16,3xFLAG</sup></i>        | Derived from yAAH1568. Used to generate <i>in vitro</i> splicing extracts containing Hsh155 Hs 5-16 with 3 copies of the FLAG tag.                                                                                                                                                                 |
| yTJC0869              | <i>MAT a prc1 prb1 pep4 leu2 trp1 ura3 PRP5V5 hsh155::kanMX pRS414-HSH155<sup>Hs5-16 R1074H,3xFLAG</sup></i> | Derived from yAAH1568. Used to generate <i>in vitro</i> splicing extracts containing Hsh155 Hs 5-16 R1074H with 3 copies of the FLAG tag.                                                                                                                                                          |
| yAAH1950              | <i>MAT a cup1Δ ura3 his3 trp1 lys2 ade2 leu2 pRS414-HSH155<sup>WT,3xFLAG</sup></i>                           | Merodiploid strain expressing Hsh155 WT with C-terminal 3 copies of the FLAG tag.                                                                                                                                                                                                                  |
| yAAH1951              | <i>MAT a cup1Δ ura3 his3 trp1 lys2 ade2 leu2 pRS414-HSH155<sup>N4A,3xFLAG</sup></i>                          | Merodiploid strain expressing Hsh155 N4A (T178A, R181A, R182A, R186A) with C-terminal 3 copies of the FLAG tag.                                                                                                                                                                                    |
| yAAH1952              | <i>MAT a cup1Δ ura3 his3 trp1 lys2 ade2 leu2 pRS414-HSH155<sup>R775A,3xFLAG</sup></i>                        | Merodiploid strain expressing Hsh155 R775A with 3 copies of the FLAG tag.                                                                                                                                                                                                                          |
| yAAH1953              | <i>MAT a cup1Δ ura3 his3 trp1 lys2 ade2 leu2 pRS414-HSH155<sup>R778A,3xFLAG</sup></i>                        | Merodiploid strain expressing Hsh155 R778A with 3 copies of the FLAG tag.                                                                                                                                                                                                                          |
| yAAH1954              | <i>MAT a cup1Δ ura3 his3 trp1 lys2 ade2 leu2 pRS414-HSH155<sup>K818A,3xFLAG</sup></i>                        | Merodiploid strain expressing Hsh155 K818A with 3 copies of the FLAG tag.                                                                                                                                                                                                                          |

|          |                                                                                                                                        |                                                                                        |
|----------|----------------------------------------------------------------------------------------------------------------------------------------|----------------------------------------------------------------------------------------|
| yAAH1955 | <i>MAT α cup1Δ ura3 his3 trp1 lys2 ade2 leu2 hsh155::kanMX pRS414-HSH155<sup>N4A</sup> prp2::hphMX pRS415-PRP2<sup>WT</sup></i>        | Strain expressing Hsh155 N4A (T178A, R181A, R182A, R186A) and Prp2 WT from plasmids    |
| yAAH1956 | <i>MAT α cup1Δ ura3 his3 trp1 lys2 ade2 leu2 hsh155::kanMX pRS414-HSH155<sup>N4A</sup> prp2::hphMX pRS415-PRP2<sup>Q548N</sup></i>     | Strain expressing Hsh155 N4A (T178A, R181A, R182A, R186A) and Prp2 Q548N from plasmids |
| yAAH1957 | <i>MAT α cup1Δ ura3 his3 trp1 lys2 ade2 leu2 hsh155::kanMX pRS414-HSH155<sup>275-972</sup> prp2::hphMX pRS415-PRP2<sup>WT</sup></i>    | Strain expressing Hsh155 275-972 and Prp2 WT from plasmids                             |
| yAAH1958 | <i>MAT α cup1Δ ura3 his3 trp1 lys2 ade2 leu2 hsh155::kanMX pRS414-HSH155<sup>275-972</sup> prp2::hphMX pRS415-PRP2<sup>Q548N</sup></i> | Strain expressing Hsh155 275-972 and Prp2 Q548N from plasmids                          |
| yAAH1959 | <i>MAT α cup1Δ ura3 his3 trp1 lys2 ade2 leu2 hsh155::kanMX pRS414-HSH155<sup>V783A</sup> prp2::hphMX pRS415-PRP2<sup>WT</sup></i>      | Strain expressing Hsh155 V783A and Prp2 WT from plasmids                               |
| yAAH1960 | <i>MAT α cup1Δ ura3 his3 trp1 lys2 ade2 leu2 hsh155::kanMX pRS414-HSH155<sup>V783A</sup> prp2::hphMX pRS415-PRP2<sup>Q548N</sup></i>   | Strain expressing Hsh155 V783A and Prp2 Q548N from plasmids                            |
| yAAH1961 | <i>MAT α cup1Δ ura3 his3 trp1 lys2 ade2 leu2 hsh155::kanMX pRS414-HSH155<sup>V783L</sup> prp2::hphMX pRS415-PRP2<sup>WT</sup></i>      | Strain expressing Hsh155 V783L and Prp2 WT from plasmids                               |
| yAAH1962 | <i>MAT α cup1Δ ura3 his3 trp1 lys2 ade2 leu2 hsh155::kanMX pRS414-HSH155<sup>V783L</sup> prp2::hphMX pRS415-PRP2<sup>Q548N</sup></i>   | Strain expressing Hsh155 V783L and Prp2 Q548N from plasmids                            |

<sup>1</sup>Originally described in Lesser and Guthrie 1993.

<sup>2</sup>Originally described in Carrocci et al. 2017.
