# Supplementary material for: Functional analysis of Hsh155/SF3b1 interactions with the U2 snRNA/branch site duplex
Source: PubMed Central journal article supplement — RNA. 2018 Aug;24(8):1028–40. doi: 10.1261/rna.065664.118 (PMC6049509; doi:10.1261/rna.065664.118), 2018-08
Supplement: supp_065664.118_Supplemental_Table_S3.pdf [file supp_065664.118_Supplemental_Table_S3.pdf]

**Supplemental Table S3: Region exchanged is highlighted in yellow and the 3xFLAG tag is shown in red**

| Name                     | Primary Sequence                                                                                                                                                                                                                                                                                                                                                                                                                                                                                                                                                                                                                                                                                                                                                                                                                                                                                                                                                                                                                                                                                                                                                                                                                                                                                                 |
|--------------------------|------------------------------------------------------------------------------------------------------------------------------------------------------------------------------------------------------------------------------------------------------------------------------------------------------------------------------------------------------------------------------------------------------------------------------------------------------------------------------------------------------------------------------------------------------------------------------------------------------------------------------------------------------------------------------------------------------------------------------------------------------------------------------------------------------------------------------------------------------------------------------------------------------------------------------------------------------------------------------------------------------------------------------------------------------------------------------------------------------------------------------------------------------------------------------------------------------------------------------------------------------------------------------------------------------------------|
| Hsh155 Hs1-5<br>3xFLAG   | <p>MSHPIQFVNANNSDKSHQLGGQYSIPQDLRENLOKEAARIGENEKDVLOEKMETRTVQNREDSYHKRRFDMKFEPSDSTQTVTSSSENTQDAVVR<br/>                     KRKSRWDVKGYEPPDESSTAVKENSALSALVNVEGIDHLMFVKPSDHKYFADVISKPIDELNKDEQKERKIMKLLKIKNGTTPMRKAALRQITD<br/>                     KAREFGAGPLFNQILPLLMSPTLEDQERHLLVKVIDRILYKLDLVRPYPYHKLIVVIEPLIIDEDYARVEGREIISNLAKAAGLATMISMRPD<br/>                     IDNMDEYVRNNTARAFVAVSALGIPSLLPFLKAACKHSRKSWSKARHTGKIKVQQAIIILMGCAILPHLRSVVEIEHGLVDEQKQVRTISALAI<br/>                     LAEAATPYGIESFDSVLKPLWKGIRQHRGKGLAFLKAIGYLIPLMDAEYANYTREVMLILIREFQSPDEEMKIKVLKVKQCCGTGDVEANYI<br/>                     KTEILPPFFKHFQHRMALDRRNYRQLVDTTVELANKVGAAEISIRIVDDLKDEAEQYRKMVMETIEKIMGNLGAADIDHKLEEQLIDGILYAFQ<br/>                     EQTTEDSVMLNGFGTVVNALGKRVKPYLPQICGTVLWRLNNSAKVRQQAADLCAILIPVKNCHFEMLNKLNILYESLGEVYPEVLGSIINA<br/>                     MYCITSVMMDLKLQPPINQILPPTLTPILRNKHKRKEVNTIKFVGLIGKLAPTYAPKPEWMRICEFELLELLKSTNKEIRRSANATFGIAEAI<br/>                     GPHDVLVALLNLLKQVQERQLRVCATAVAIGIVAKVCGPYNVLVIMNEYTPPETNVQNGVLKAMSFMEYIGNMSKDYIYFITPPLLEDALDTRDLVHRQ<br/>                     TASNVIHTHALNCSGTGHEDAFIHLMNLLIPNIFETSPHAIMRILEGLEALSQALGPGLFMNYIWAGLFHPAKNVRKAFWRVYNNMYVMYQDAMV<br/>                     PFYPVTPDNNEEYIEELDLVLGGSGGS <b>DYKDHDGDYKDHDIDYKDDDDX</b></p> |
| Hsh155 Hs1-12<br>3xFLAG  | <p>MSHPIQFVNANNSDKSHQLGGQYSIPQDLRENLOKEAARIGENEKDVLOEKMETRTVQNREDSYHKRRFDMKFEPSDSTQTVTSSSENTQDAVVR<br/>                     KRKSRWDVKGYEPPDESSTAVKENSALSALVNVEGIDHLMFVKPSDHKYFADVISKPIDELNKDEQKERKIMKLLKIKNGTTPMRKAALRQITD<br/>                     KAREFGAGPLFNQILPLLMSPTLEDQERHLLVKVIDRILYKLDLVRPYPYHKLIVVIEPLIIDEDYARVEGREIISNLAKAAGLATMISMRPD<br/>                     IDNMDEYVRNNTARAFVAVSALGIPSLLPFLKAACKHSKSWARHTGKIKVQQAIIILMGCAILPHLRSVVEIEHGLVDEQKQVRTISALAI<br/>                     LAEAATPYGIESFDSVLKPLWKGIRQHRGKGLAFLKAIGYLIPLMDAEYANYTREVMLILIREFQSPDEEMKIKVLKVKQCCGTGDVEANYI<br/>                     KTEILPPFFKHFQHRMALDRRNYRQLVDTTVELANKVGAAEISIRIVDDLKDEAEQYRKMVMETIEKIMGNLGAADIDHKLEEQLIDGILYAFQ<br/>                     EQTTEDSVMLNGFGTVVNALGKRVKPYLPQICGTVLWRLNNSAKVRQQAADLCAILIPVKNCHFEMLNKLNILYESLGEVYPEVLGSIINA<br/>                     MYCITSVMMDLKLQPPINQILPPTLTPILRNKHKRKEVNTIKFVGLIGKLAPTYAPKPEWMRICEFELLELLKSTNKEIRRSANATFGIAEAI<br/>                     GPHDVLVALLNLLKQVQERQLRVCATAVAIGIVAKVCGPYNVLVIMNEYTPPETNVQNGVLKAMSFMEYIGNMSKDYIYFITPPLLEDALDTRDLVHRQ<br/>                     TASNVIHTHALNCSGTGHEDAFIHLMNLLIPNIFETSPHAIMRILEGLEALSQALGPGLFMNYIWAGLFHPAKNVRKAFWRVYNNMYVMYQDAMV<br/>                     PFYPVTPDNNEEYIEELDLVLGGSGGS <b>DYKDHDGDYKDHDIDYKDDDDX</b></p>    |
| Hsh155 Hs1-16<br>3xFLAG  | <p>MSHPIQFVNANNSDKSHQLGGQYSIPQDLRENLOKEAARIGENEKDVLOEKMETRTVQNREDSYHKRRFDMKFEPSDSTQTVTSSSENTQDAVVR<br/>                     KRKSRWDVKGYEPPDESSTAVKENSALSALVNVEGIDHLMFVKPSDHKYFADVISKPIDELNKDEQKERKIMKLLKIKNGTTPMRKAALRQITD<br/>                     KAREFGAGPLFNQILPLLMSPTLEDQERHLLVKVIDRILYKLDLVRPYPYHKLIVVIEPLIIDEDYARVEGREIISNLAKAAGLATMISMRPD<br/>                     IDNMDEYVRNNTARAFVAVSALGIPSLLPFLKAACKHSKSWARHTGKIKVQQAIIILMGCAILPHLRSVVEIEHGLVDEQKQVRTISALAI<br/>                     LAEAATPYGIESFDSVLKPLWKGIRQHRGKGLAFLKAIGYLIPLMDAEYANYTREVMLILIREFQSPDEEMKIKVLKVKQCCGTGDVEANYI<br/>                     KTEILPPFFKHFQHRMALDRRNYRQLVDTTVELANKVGAAEISIRIVDDLKDEAEQYRKMVMETIEKIMGNLGAADIDHKLEEQLIDGILYAFQ<br/>                     EQTTEDSVMLNGFGTVVNALGKRVKPYLPQICGTVLWRLNNSAKVRQQAADLCAILIPVKNCHFEMLNKLNILYESLGEVYPEVLGSIINA<br/>                     MYCITSVMMDLKLQPPINQILPPTLTPILRNKHKRKEVNTIKFVGLIGKLAPTYAPKPEWMRICEFELLELLKSTNKEIRRSANATFGIAEAI<br/>                     GPHDVLVALLNLLKQVQERQLRVCATAVAIGIVAKVCGPYNVLVIMNEYTPPETNVQNGVLKAMSFMEYIGNMSKDYIYFITPPLLEDALDTRDLVHRQ<br/>                     TASNVIHTHALNCSGTGHEDAFIHLMNLLIPNIFETSPHAIMRILEGLEALSQALGPGLFMNYIWAGLFHPAKNVRKAFWRVYNNMYVMYQDAMV<br/>                     PFYPVTPDNNEEYIEELDLVLGGSGGS <b>DYKDHDGDYKDHDIDYKDDDDX</b></p>    |
| Hsh155 Hs5-12<br>3xFLAG  | <p>MSHPIQFVNANNSDKSHQLGGQYSIPQDLRENLOKEAARIGENEKDVLOEKMETRTVQNREDSYHKRRFDMKFEPSDSTQTVTSSSENTQDAVVR<br/>                     KRKSRWDVKGYEPPDESSTAVKENSALSALVNVEGIDHLMFVKPSDHKYFADVISKPIDELNKDEKERTLSMLLLKIKNGTASRRTSMRILTD<br/>                     KAVTFGPEMIFNRLLPILLDRSLEDQERHLMIKTIDRVLYQLGDLTKPYVHKILVVAAPLLIDEDPMVRSTGQEIITNLSTVAGLKTILTVMRPD<br/>                     IENEDEYVRNNTSRAAAVAKALGVNQLLPPINAACKSKSWSQARHTGKIKVQQAIIILMGCAILPHLRSVVEIEHGLVDEQKQVRTISALAI<br/>                     LAEAATPYGIESFDSVLKPLWKGIRQHRGKGLAFLKAIGYLIPLMDAEYANYTREVMLILIREFQSPDEEMKIKVLKVKQCCGTGDVEANYI<br/>                     KTEILPPFFKHFQHRMALDRRNYRQLVDTTVELANKVGAAEISIRIVDDLKDEAEQYRKMVMETIEKIMGNLGAADIDHKLEEQLIDGILYAFQ<br/>                     EQTTEDSVMLNGFGTVVNALGKRVKPYLPQICGTVLWRLNNSAKVRQQAADLCAILIPVKNCHFEMLNKLNILYESLGEVYPEVLGSIINA<br/>                     MYCITSVMMDLKLQPPINQILPPTLTPILRNKHKRKEVNTIKFVGLIGKLAPTYAPKPEWMRICEFELLELLKSTNKEIRRSANATFGIAEAI<br/>                     GPHDVLVALLNLLKQVQERQLRVCATAVAIGIVAKVCGPYNVLVIMNEYTPPETNVQNGVLKAMSFMEYIGNMSKDYIYFITPPLLEDALDTRDLVHRQ<br/>                     TASNVIHTHALNCSGTGHEDAFIHLMNLLIPNIFETSPHAIMRILEGLEALSQALGPGLFMNYIWAGLFHPAKNVRKAFWRVYNNMYVMYQDAMV<br/>                     PFYPVTPDNNEEYIEELDLVLGGSGGS <b>DYKDHDGDYKDHDIDYKDDDDX</b></p>  |
| Hsh155 Hs5-16<br>3xFLAG  | <p>MSHPIQFVNANNSDKSHQLGGQYSIPQDLRENLOKEAARIGENEKDVLOEKMETRTVQNREDSYHKRRFDMKFEPSDSTQTVTSSSENTQDAVVR<br/>                     KRKSRWDVKGYEPPDESSTAVKENSALSALVNVEGIDHLMFVKPSDHKYFADVISKPIDELNKDEKERTLSMLLLKIKNGTASRRTSMRILTD<br/>                     KAVTFGPEMIFNRLLPILLDRSLEDQERHLMIKTIDRVLYQLGDLTKPYVHKILVVAAPLLIDEDPMVRSTGQEIITNLSTVAGLKTILTVMRPD<br/>                     IENEDEYVRNNTSRAAAVAKALGVNQLLPPINAACKSKSWSQARHTGKIKVQQAIIILMGCAILPHLRSVVEIEHGLVDEQKQVRTISALAI<br/>                     LAEAATPYGIESFDSVLKPLWKGIRQHRGKGLAFLKAIGYLIPLMDAEYANYTREVMLILIREFQSPDEEMKIKVLKVKQCCGTGDVEANYI<br/>                     KTEILPPFFKHFQHRMALDRRNYRQLVDTTVELANKVGAAEISIRIVDDLKDEAEQYRKMVMETIEKIMGNLGAADIDHKLEEQLIDGILYAFQ<br/>                     EQTTEDSVMLNGFGTVVNALGKRVKPYLPQICGTVLWRLNNSAKVRQQAADLCAILIPVKNCHFEMLNKLNILYESLGEVYPEVLGSIINA<br/>                     MYCITSVMMDLKLQPPINQILPPTLTPILRNKHKRKEVNTIKFVGLIGKLAPTYAPKPEWMRICEFELLELLKSTNKEIRRSANATFGIAEAI<br/>                     GPHDVLVALLNLLKQVQERQLRVCATAVAIGIVAKVCGPYNVLVIMNEYTPPETNVQNGVLKAMSFMEYIGNMSKDYIYFITPPLLEDALDTRDLVHRQ<br/>                     TASNVIHTHALNCSGTGHEDAFIHLMNLLIPNIFETSPHAIMRILEGLEALSQALGPGLFMNYIWAGLFHPAKNVRKAFWRVYNNMYVMYQDAMV<br/>                     PFYPVTPDNNEEYIEELDLVLGGSGGS <b>DYKDHDGDYKDHDIDYKDDDDX</b></p>  |
| Hsh155 Hs5-20<br>3xFLAG  | <p>MSHPIQFVNANNSDKSHQLGGQYSIPQDLRENLOKEAARIGENEKDVLOEKMETRTVQNREDSYHKRRFDMKFEPSDSTQTVTSSSENTQDAVVR<br/>                     KRKSRWDVKGYEPPDESSTAVKENSALSALVNVEGIDHLMFVKPSDHKYFADVISKPIDELNKDEKERTLSMLLLKIKNGTASRRTSMRILTD<br/>                     KAVTFGPEMIFNRLLPILLDRSLEDQERHLMIKTIDRVLYQLGDLTKPYVHKILVVAAPLLIDEDPMVRSTGQEIITNLSTVAGLKTILTVMRPD<br/>                     IENEDEYVRNNTSRAAAVAKALGVNQLLPPINAACKSKSWSQARHTGKIKVQQAIIILMGCAILPHLRSVVEIEHGLVDEQKQVRTISALAI<br/>                     LAEAATPYGIESFDSVLKPLWKGIRQHRGKGLAFLKAIGYLIPLMDAEYANYTREVMLILIREFQSPDEEMKIKVLKVKQCCGTGDVEANYI<br/>                     KTEILPPFFKHFQHRMALDRRNYRQLVDTTVELANKVGAAEISIRIVDDLKDEAEQYRKMVMETIEKIMGNLGAADIDHKLEEQLIDGILYAFQ<br/>                     EQTTEDSVMLNGFGTVVNALGKRVKPYLPQICGTVLWRLNNSAKVRQQAADLCAILIPVKNCHFEMLNKLNILYESLGEVYPEVLGSIINA<br/>                     MYCITSVMMDLKLQPPINQILPPTLTPILRNKHKRKEVNTIKFVGLIGKLAPTYAPKPEWMRICEFELLELLKSTNKEIRRSANATFGIAEAI<br/>                     GPHDVLVALLNLLKQVQERQLRVCATAVAIGIVAKVCGPYNVLVIMNEYTPPETNVQNGVLKAMSFMEYIGNMSKDYIYFITPPLLEDALDTRDLVHRQ<br/>                     TASNVIHTHALNCSGTGHEDAFIHLMNLLIPNIFETSPHAIMRILEGLEALSQALGPGLFMNYIWAGLFHPAKNVRKAFWRVYNNMYVMYQDAMV<br/>                     PFYPVTPDNNEEYIEELDLVLGGSGGS <b>DYKDHDGDYKDHDIDYKDDDDX</b></p>  |
| Hsh155 Hs12-20<br>3xFLAG | <p>MSHPIQFVNANNSDKSHQLGGQYSIPQDLRENLOKEAARIGENEKDVLOEKMETRTVQNREDSYHKRRFDMKFEPSDSTQTVTSSSENTQDAVVR<br/>                     KRKSRWDVKGYEPPDESSTAVKENSALSALVNVEGIDHLMFVKPSDHKYFADVISKPIDELNKDEKERTLSMLLLKIKNGTASRRTSMRILTD<br/>                     KAVTFGPEMIFNRLLPILLDRSLEDQERHLMIKTIDRVLYQLGDLTKPYVHKILVVAAPLLIDEDPMVRSTGQEIITNLSTVAGLKTILTVMRPD<br/>                     IENEDEYVRNNTSRAAAVAKALGVNQLLPPINAACKSKSWSKARHTGKIKVQQAIIILMGCAILPHLRSVVEIEHGLVDEQKQVRTISALAI<br/>                     LAEAATPYGIESFDSVLKPLWKGIRQHRGKGLAFLKAIGYLIPLMDAEYANYTREVMLILIREFQSPDEEMKIKVLKVKQCCGTGDVEANYI<br/>                     KTEILPPFFKHFQHRMALDRRNYRQLVDTTVELANKVGAAEISIRIVDDLKDEAEQYRKMVMETIEKIMGNLGAADIDHKLEEQLIDGILYAFQ<br/>                     EQTTEDSVMLNGFGTVVNALGKRVKPYLPQICGTVLWRLNNSAKVRQQAADLCAILIPVKNCHFEMLNKLNILYESLGEVYPEVLGSIINA<br/>                     MYCITSVMMDLKLQPPINQILPPTLTPILRNKHKRKEVNTIKFVGLIGKLAPTYAPKPEWMRICEFELLELLKSTNKEIRRSANATFGIAEAI<br/>                     GPHDVLVALLNLLKQVQERQLRVCATAVAIGIVAKVCGPYNVLVIMNEYTPPETNVQNGVLKAMSFMEYIGNMSKDYIYFITPPLLEDALDTRDLVHRQ<br/>                     TASNVIHTHALNCSGTGHEDAFIHLMNLLIPNIFETSPHAIMRILEGLEALSQALGPGLFMNYIWAGLFHPAKNVRKAFWRVYNNMYVMYQDAMV<br/>                     PFYPVTPDNNEEYIEELDLVLGGSGGS <b>DYKDHDGDYKDHDIDYKDDDDX</b></p>  |
